# Supplementary material for: Rhizo-inoculation of phosphate solubilizing bacteria strains to improve rice (Oryza sativa L. var. FARO 44) growth under ferruginous ultisol conditions.
Source: Research Square preprint supplement (doi:10.21203/rs.3.rs-1033942/v2), 2022-02-03
Supplement: Supplementary file 1 [file 4da965a95f52bdf657a0ae31.docx]

Addendum


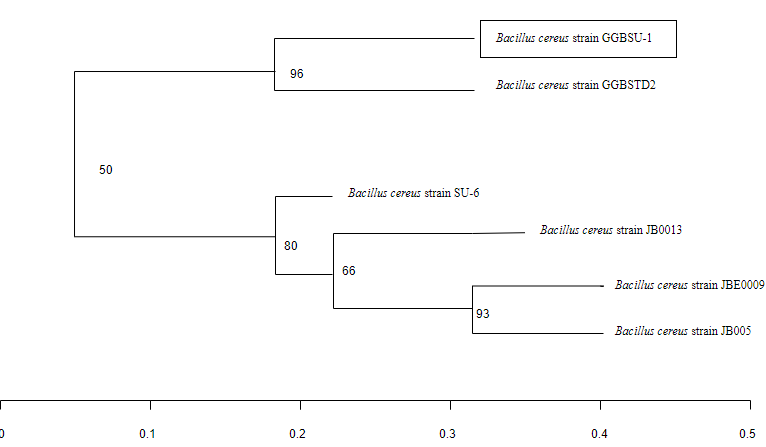


Plate 1A: Phylogenetic relationship of *Bacillus cereus* strain GGBSU-1 (Musa and Ikhajigbe, 2021).


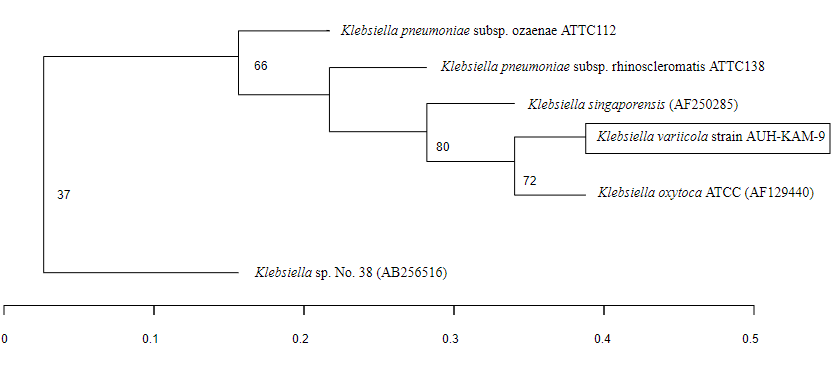


Plate 1B: Phylogenetic relationship of *Klebsiella variicola* strain AUH-KAM-9 (Musa and Ikhajigbe, 2021).


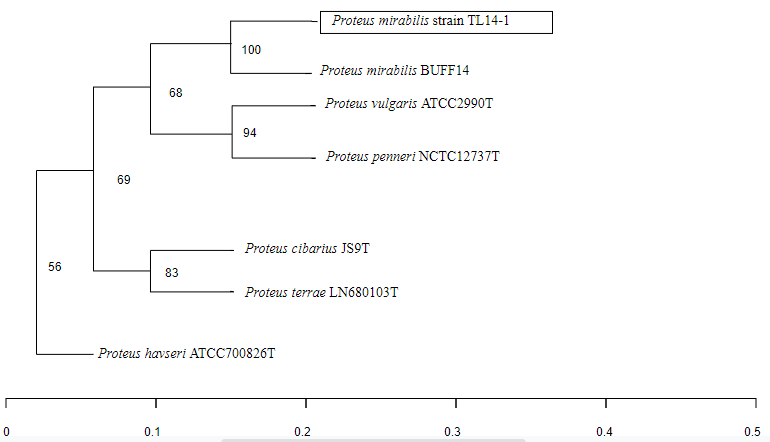


Plate 1C: Phylogenetic relationship of *Proteus mirabilis* strain TL14-1 (Musa and Ikhajigbe, 2021).


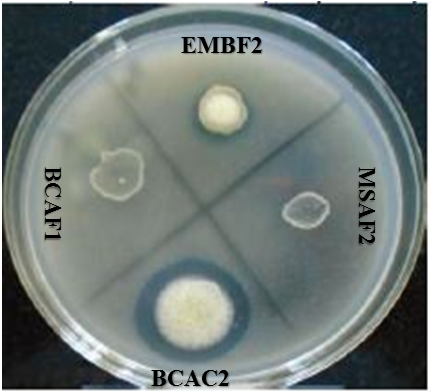


Plate 2: PSB showing efficiency in solubilization of insoluble phosphate by forming holo-zone (Musa and Ikhajigbe, 2021).

**
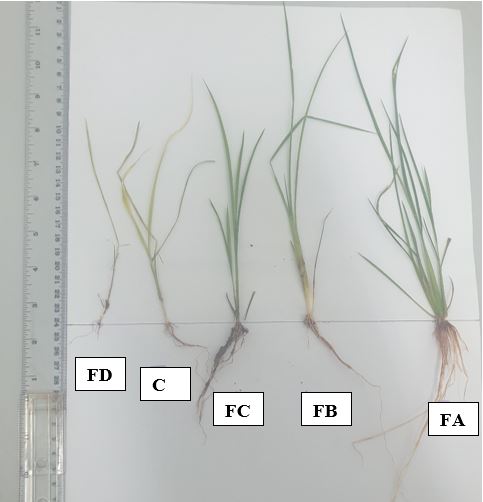
**

**{“0**

Plate 3:Rice seedling morphology at 2 weeks after rhizo-inoculation (30 days after sowing).
